# Supplementary material
Source: Springer Nature journal article supplement (https://www.springermedizin.de/resource/supplementary/12967_2013_1750_MOESM7_ESM.pdf/9575202)

PI3K p85

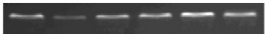

213bp

$\beta$ -actin

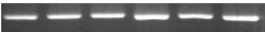

388bp

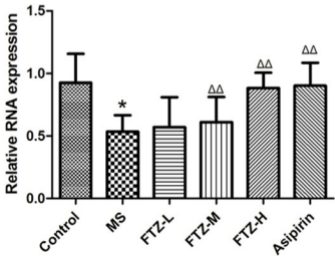

Supplement: MOESM7 [file 9575202]
